# Supplementary material for: MUC1-C is a target of salinomycin in inducing ferroptosis of cancer stem cells
Source: PubMed Central journal article supplement (PMC10770371; doi:10.1038/s41420-023-01772-9), 2024-01-05

Fig.1D

DU-145

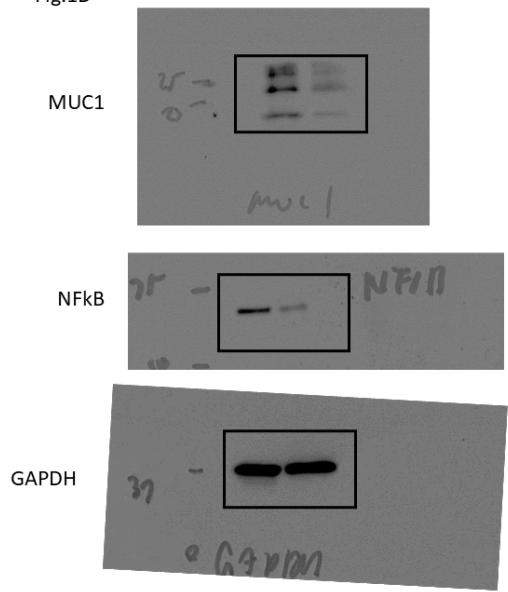

H660

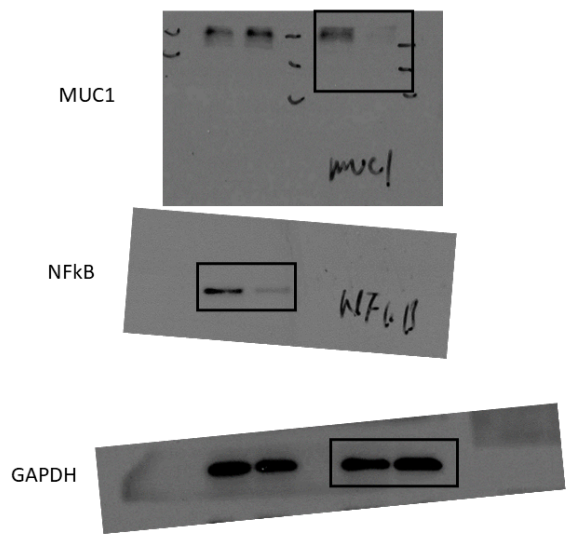

Fig.1E

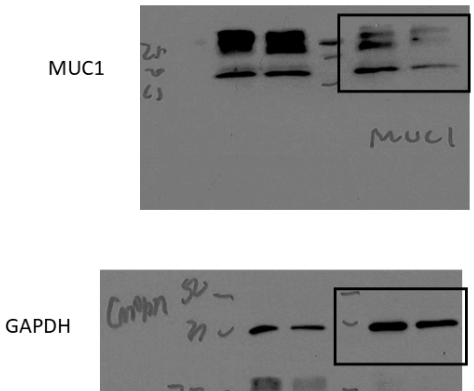

Fig.1F

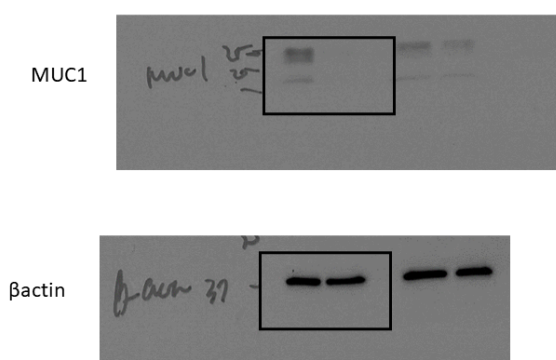

Fig.1G

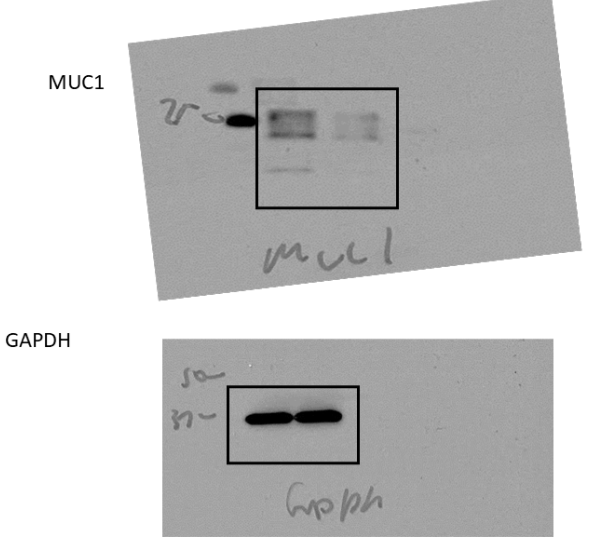

Fig.1H

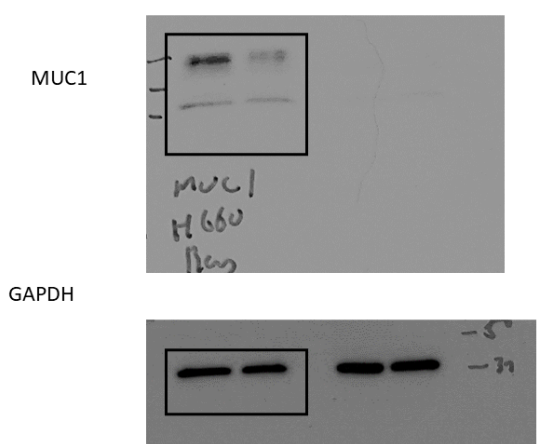

Fig.S1A

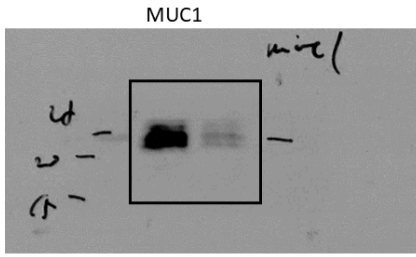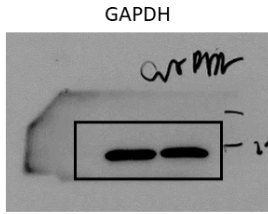

Fig.S1B

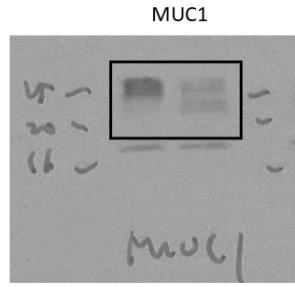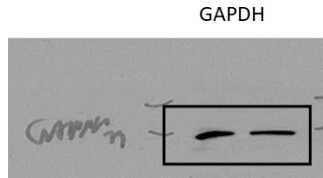

Fig.2F

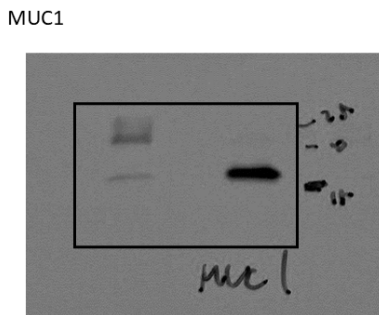

$\beta$ actin

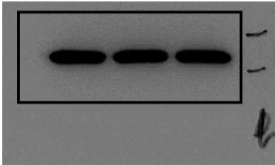

Fig.S2A

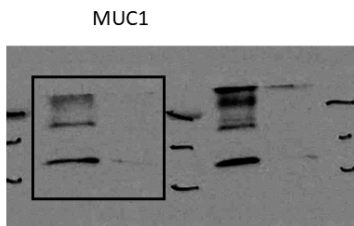

$\beta$ actin

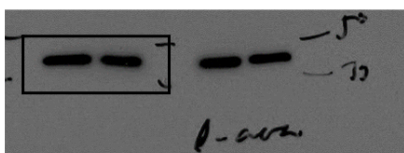

Fig.S2B

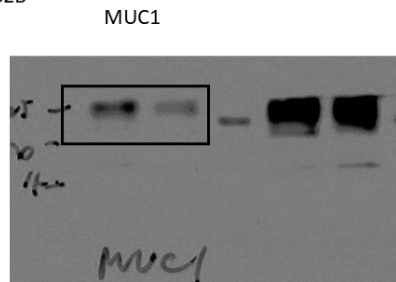

$\beta$ actin

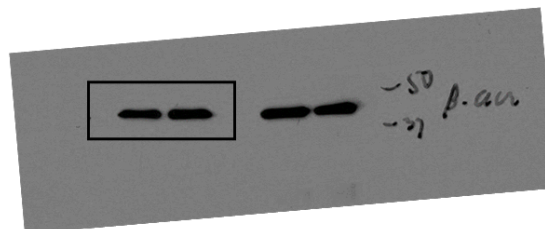

Fig.3A

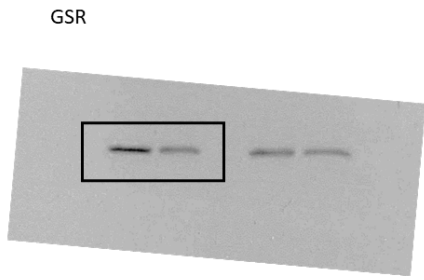

GAPDH

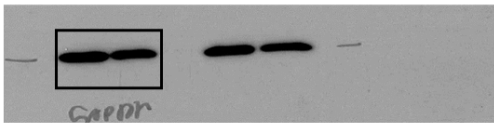

Fig.3B GSR

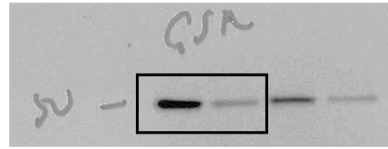

βactin

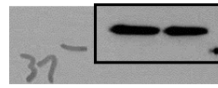

Fig.3E

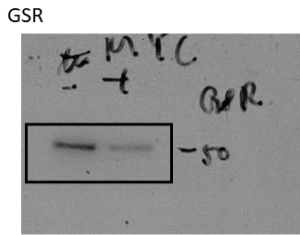

βactin

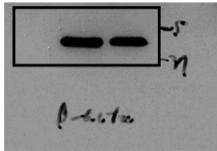

Fig.3G

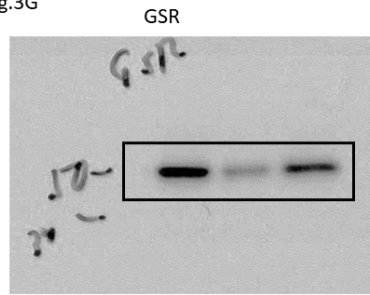

βactin

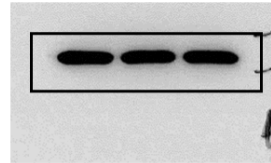

Fig.S3A

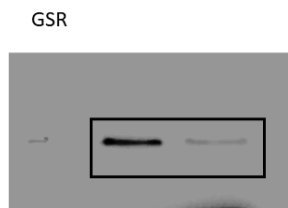

βactin

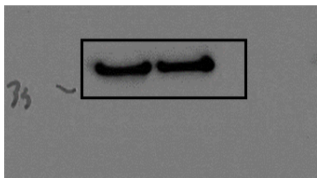

Fig.S3B GSR

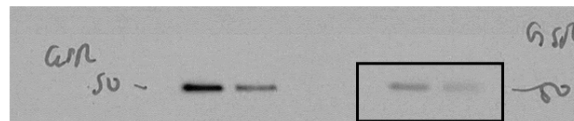

βactin

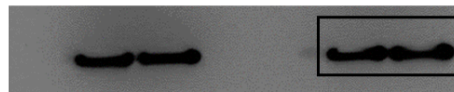

MUC1

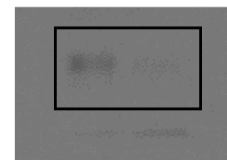

Fig.4A

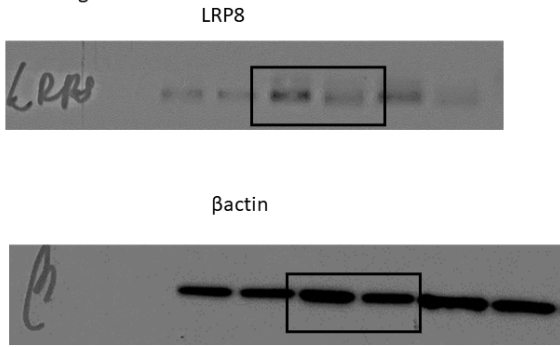

Fig.4B

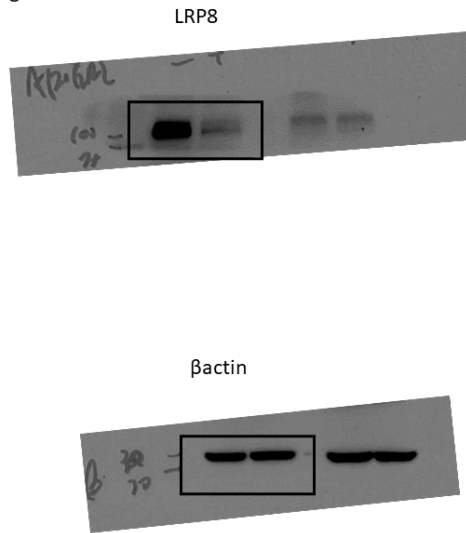

Fig.4E

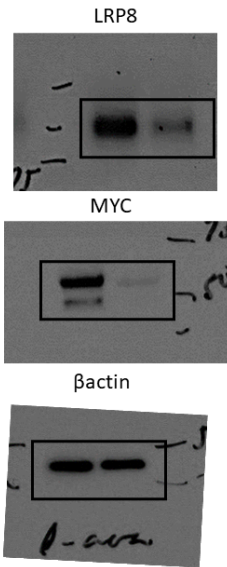

Fig.4F,H

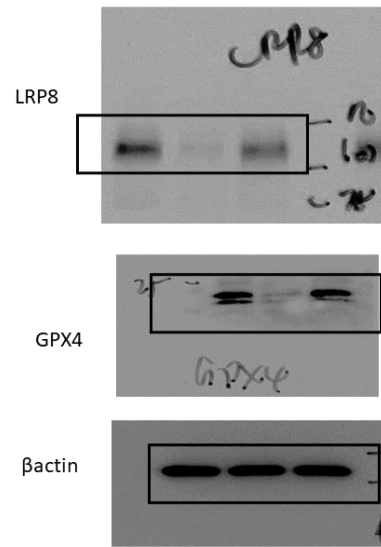

Fig.S4A

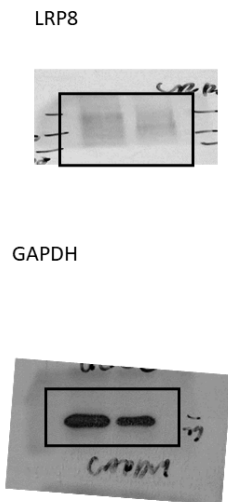

Fig.S4B

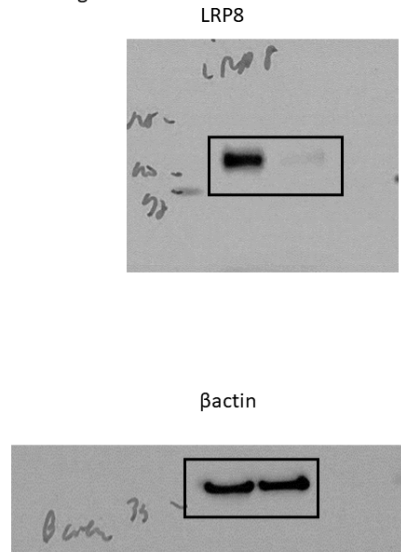

Fig.S6A

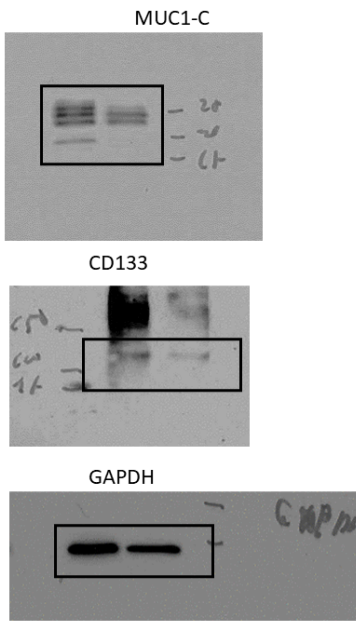

Fig.S6D

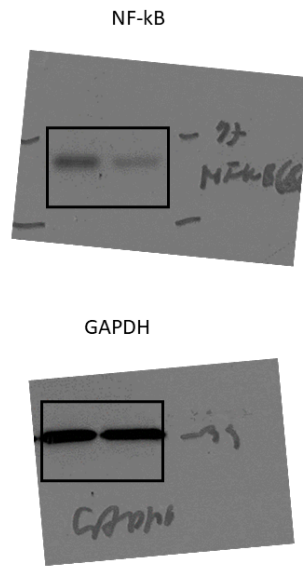

Fig.7B

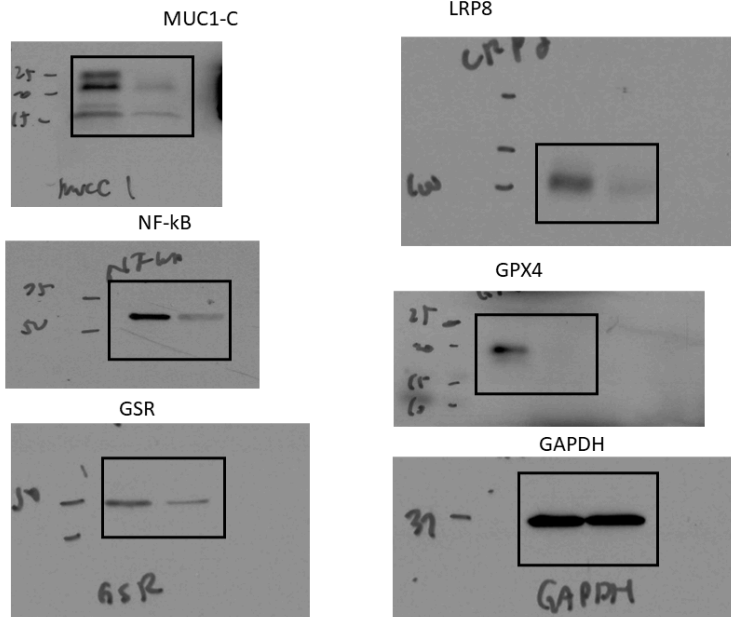

Fig.7E

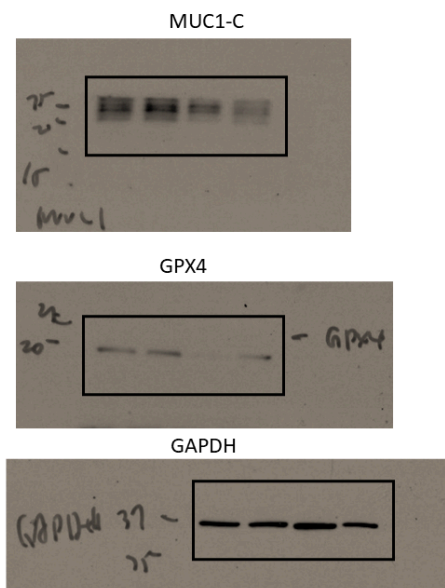

Fig.S4C

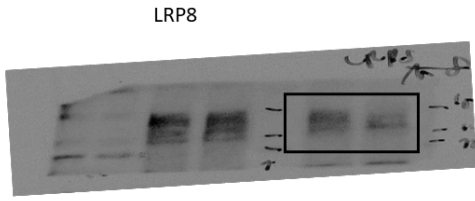

Fig.S4E

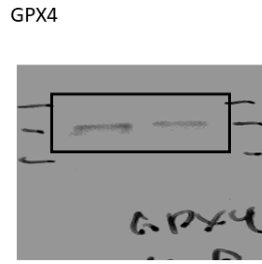

$\beta$ actin

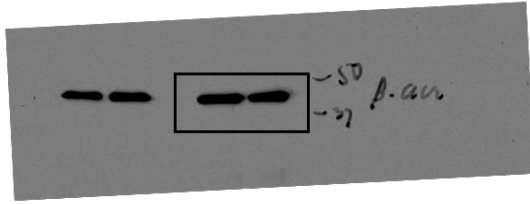

$\beta$ actin

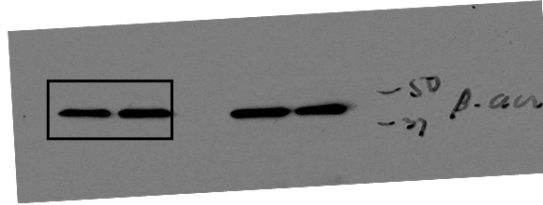

Fig.5D

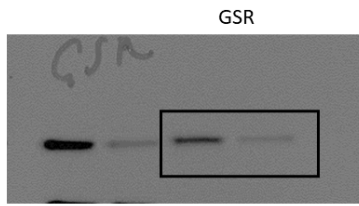

GAPDH

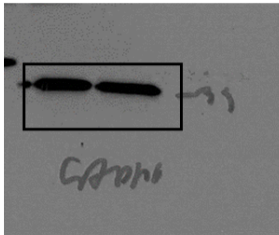

Fig.5F

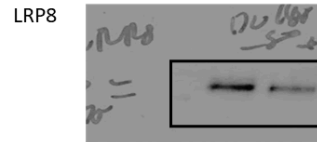

GPX4

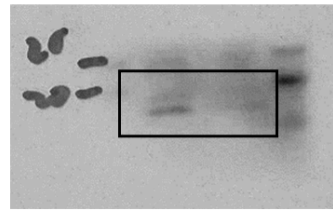

GAPDH

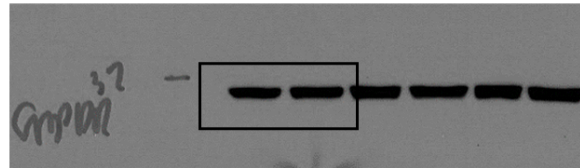

Fig.S5C

GSR

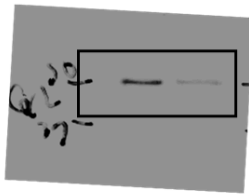

GAPDH

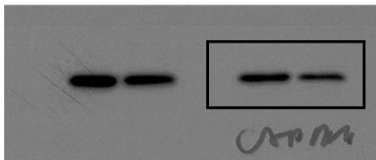

Fig.S5E

LRP8

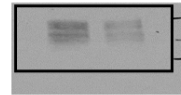

GPX4

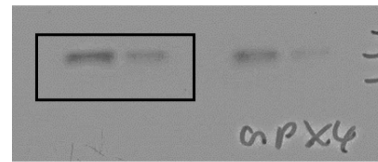

GAPDH

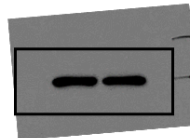

Supplement: 41420_2023_1772_MOESM2_ESM.pdf [file 41420_2023_1772_MOESM2_ESM.pdf]
