# Supplementary material for: MUC1-C is a target of salinomycin in inducing ferroptosis of cancer stem cells
Source: PubMed Central journal article supplement (PMC10770371; doi:10.1038/s41420-023-01772-9), 2024-01-05
Supplement: 41420_2023_1772_MOESM1_ESM.pdf [file 41420_2023_1772_MOESM1_ESM.pdf]

**A. BT-549**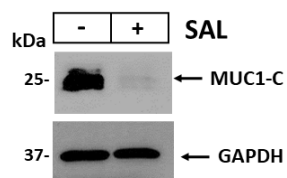**B. MDA-MB-468**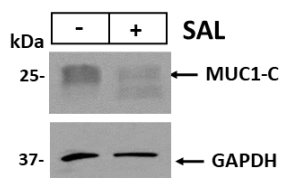

**Supplementary Figure S1. SAL downregulates MUC1-C expression in TNBC cells. A and B.** Lysates from BT-549 (A) and MDA-MB-468 (B) cells treated with vehicle or 1  $\mu$ M SAL for 48 hours were immunoblotted with antibodies against the indicated proteins.

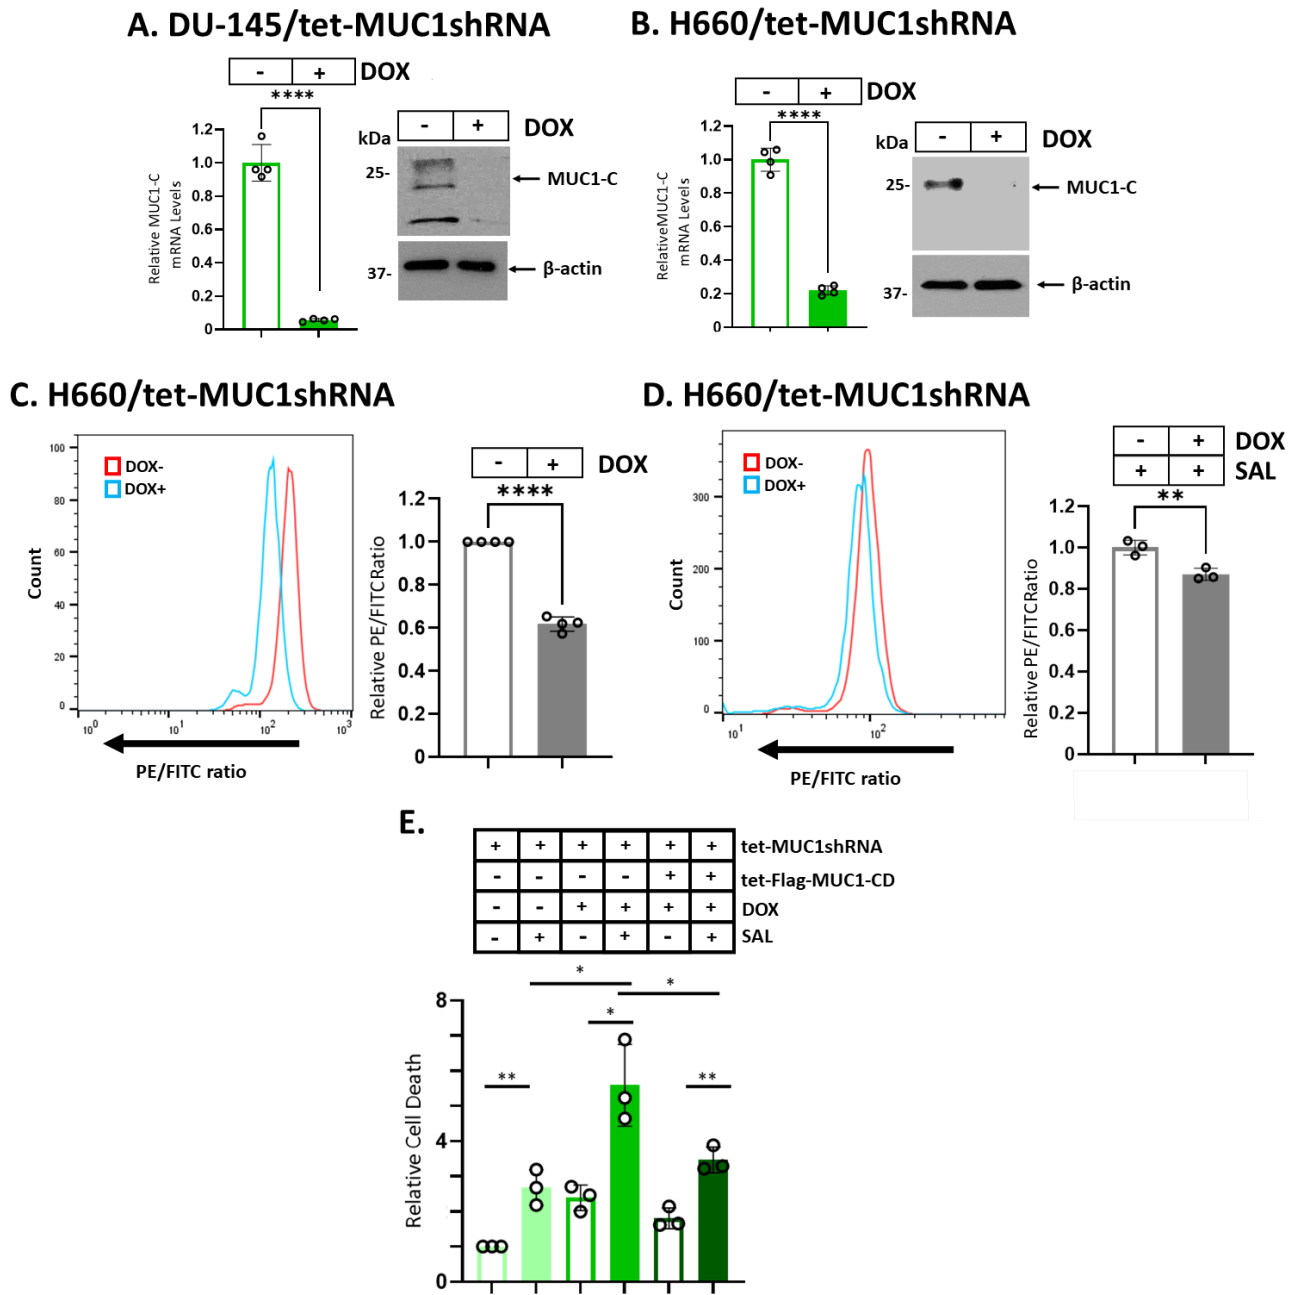

**Supplementary Figure S2. Effects of silencing MUC1-C on induction of ferroptosis.** **A and B.** DU-145/tet-MUC1shRNA (**A**) and H660/tet-MUC1shRNA (**B**) cells treated with vehicle or DOX for 7 days were analyzed for MUC1-C mRNA levels by qRT-PCR using primers listed in Supplementary Table S1. The results (mean±SD of four determinations) are expressed as relative levels compared to that obtained for vehicle-treated cells (assigned a value of 1) (left). Lysates were immunoblotted with antibodies against the indicated proteins (right). **C.** H660/tet-MUC1shRNA cells treated with vehicle or DOX for 7 days were analyzed for lipid peroxidation. Shown are histograms (left) and quantitation (mean±SD of three determinations) (right) of the PE/FITC ratios. **D.** H660/tet-MUC1shRNA cells treated with vehicle or DOX for 7 days and then incubated with 1  $\mu$ M SAL for 24 hours were analyzed for

lipid peroxidation. Shown are histograms (left) and quantitation (mean $\pm$ SD of three determinations) (right) of the PE/FITC ratios. **E.** DU-145 cells expressing tet-MUC1shRNA and tet-MUC1-C/CD vectors were treated with vehicle or DOX for 5 days and then 1  $\mu$ M SAL for an additional 2 days were analyzed for cell death by PI staining. The results (mean $\pm$ SD of four determinations) are expressed as relative cell death compared to that obtained for vehicle-treated cells (assigned a value of 1).

**A. DU-145**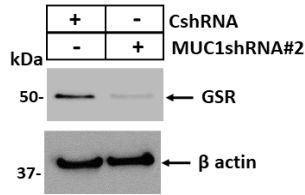**B. H660/tet-MUC1shRNA**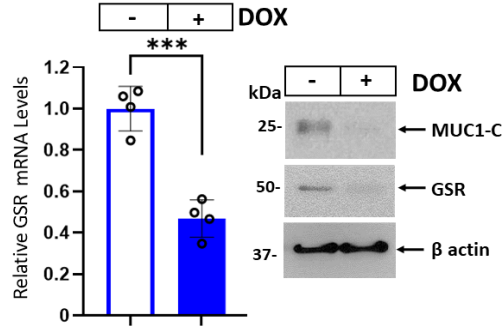**C. H660/tet-MUC1shRNA**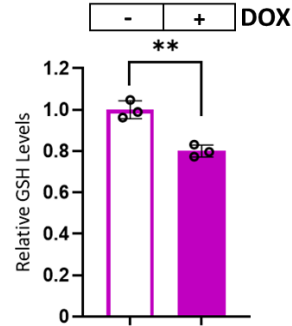

**Supplementary Figure S3. Silencing MUC1-C with MUC1shRNA#2 suppresses GSR expression.** **A.** DU-145/CshRNA and DU-145/MUC1shRNA#2 were analyzed for GSR transcripts (left). The results (mean±SD of 4 determinations) are expressed as relative GSR mRNA levels compared to that obtained in CshRNA cells (assigned a value of 1). Lysates were immunoblotted with antibodies against the indicated proteins (right). **B.** H660/tet-MUC1shRNA cells treated with vehicle or DOX for 7 days were analyzed for GSR transcripts (left). The results (mean±SD of 4 determinations) are expressed as relative GSR mRNA levels compared to that obtained in vehicle-treated cells (assigned a value of 1). Lysates were immunoblotted with antibodies against the indicated proteins (right). **C.** H660/tet-MUC1shRNA cells treated with vehicle or DOX for 7 days were analyzed for GSH levels. The results (mean±SD of 3 determinations) are expressed as relative GSH levels compared to that obtained in vehicle-treated cells (assigned a value of 1).

### A. H660

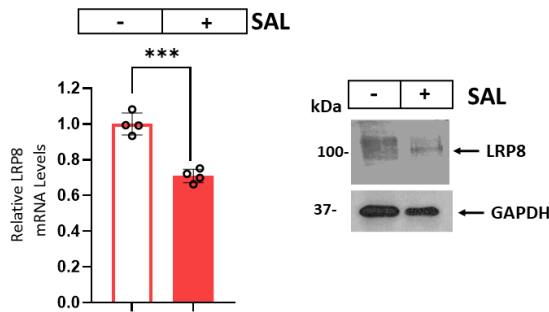

### B. DU-145

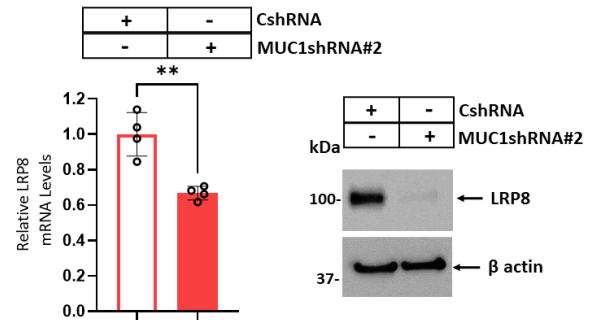

### C. H660/tet-MUC1shRNA

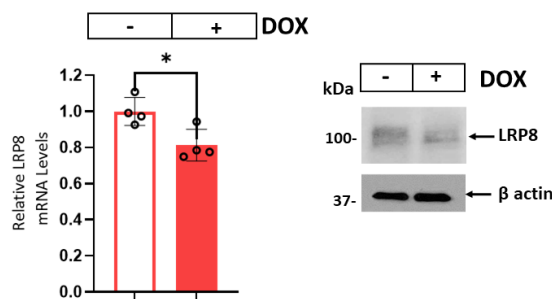

### D. DU-145/tet-MUC1shRNA

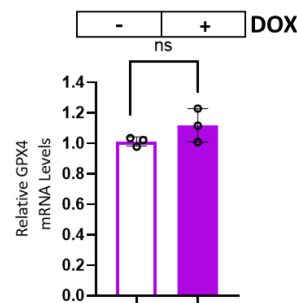

### E. H660/tet-MUC1shRNA

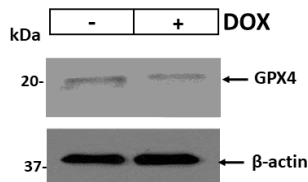

### F. H660/tet-MUC1shRNA

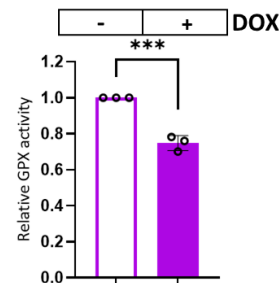

## Supplementary Figure S4. Effects of MUC1-C on LRP8 and GPX4

**expression.** **A.** H660 cells treated with vehicle or 1  $\mu$ M SAL for 24 hours were analyzed for LRP8 transcripts (left). The results (mean $\pm$ SD of 4 determinations) are expressed as relative LRP8 mRNA levels compared to that obtained in vehicle-treated cells (assigned a value of 1). Lysates were immunoblotted with antibodies against the indicated proteins (right). **B.** DU-145/CshRNA and DU-145/MUC1shRNA#2 were analyzed for LRP8 transcripts (left). The results (mean $\pm$ SD of 4 determinations) are expressed as relative GSR mRNA levels compared to that obtained in CshRNA cells (assigned a value of 1). Lysates were immunoblotted with antibodies against the indicated proteins (right). **C.** H660/tet-MUC1shRNA cells treated with vehicle or DOX for 7 days were analyzed for LRP8 transcripts (left). The results (mean $\pm$ SD of 4 determinations) are expressed as relative LRP8 mRNA levels compared to that obtained in

vehicle-treated cells (assigned a value of 1). Lysates were immunoblotted with antibodies against the indicated proteins (right). **D.** DU-145/tet-MUC1shRNA cells treated with vehicle or DOX for 7 days were analyzed for GPX4 transcripts. The results (mean $\pm$ SD of 4 determinations) are expressed as relative levels compared to that obtained in vehicle-treated cells (assigned a value of 1). **E and F.** Lysates from H660/tet-MUC1shRNA cells treated with vehicle or DOX for 7 days were immunoblotted with antibodies against the indicated proteins (**E**) and analyzed for GPX activity (**F**). The results (mean $\pm$ SD of 3 determinations) are expressed as relative GPX activity compared to that obtained in vehicle-treated cells (assigned a value of 1).

**A. H660**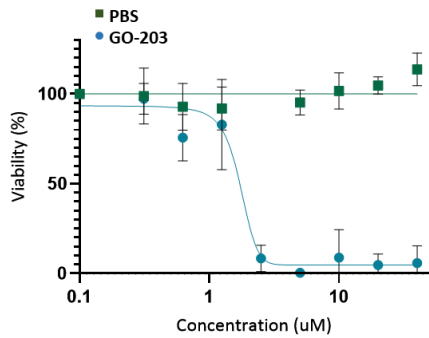**B. H660**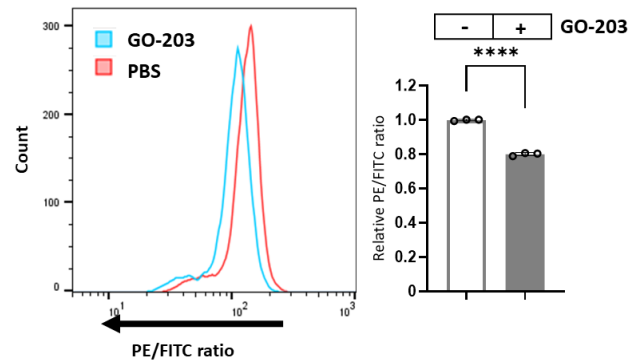**C. H660**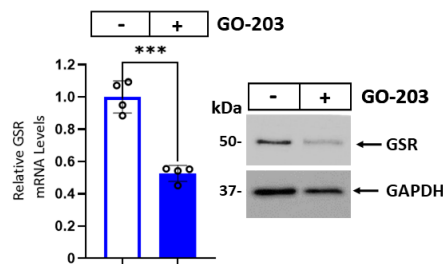**D. H660**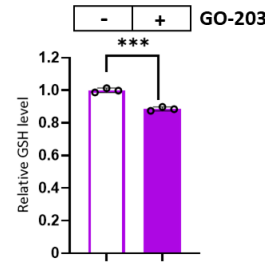**E. H660**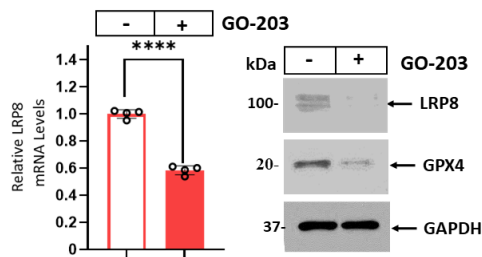**F. H660**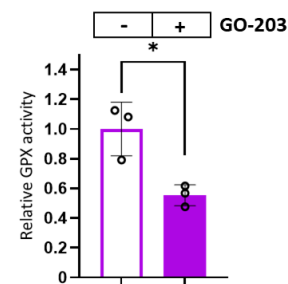

**Supplementary Figure S5. Effects of targeting MUC1-C with GO-203 in H660 cells.** **A.** H660 cells were treated with vehicle or the indicated concentrations of GO-203 for 72 hours. Viability was assessed by Alamar Blue staining. The results (mean±SD of 3 determinations) are expressed as relative viability compared to untreated cells (assigned a value of 100%). **B.** H660 cells left untreated or treated with 2 µM GO-203 for 24 hours were analyzed for lipid peroxidation. Shown are histograms (left) and quantitation (mean±SD of three determinations) (right) of the PE/FITC ratios. **C.** H660 cells left untreated or treated with 2 µM GO-203 for 24 hours were analyzed for GSR transcripts (left). The results (mean±SD of 4 determinations) are expressed as relative GSR mRNA levels compared to that obtained in untreated cells (assigned a value of 1). Lysates were immunoblotted with antibodies against the indicated proteins (right). **D.** Lysates from H660 cells left untreated or treated with 2 µM GO-203 for 24 hours were analyzed for GSH levels. The results (mean±SD of 3 determinations) are expressed as relative GSH levels compared to that obtained in untreated cells (assigned a value of 1). **E.** H660 cells

left untreated or treated with 2  $\mu\text{M}$  GO-203 for 24 hours were analyzed for LRP8 transcripts (left). The results (mean $\pm$ SD of 4 determinations) are expressed as relative LRP8 mRNA levels compared to that obtained in untreated cells (assigned a value of 1). Lysates were immunoblotted with antibodies against the indicated proteins (right). **F.** Lysates from H660 cells left untreated or treated with 2  $\mu\text{M}$  GO-203 for 24 hours were analyzed for GPX activity. The results (mean $\pm$ SD of 3 determinations) are expressed as relative GPX4 activity compared to that obtained in untreated cells (assigned a value of 1).



### A. DU-145 CSCs

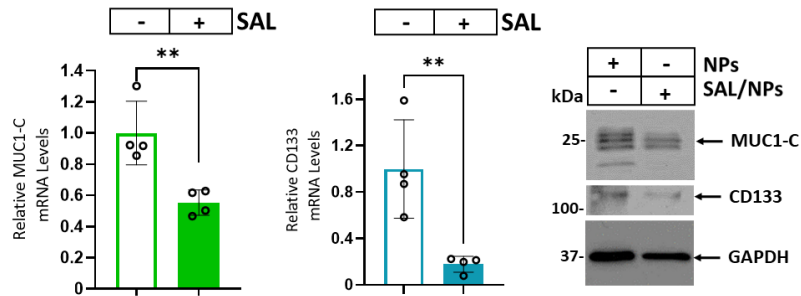

### B. DU-145 CSCs

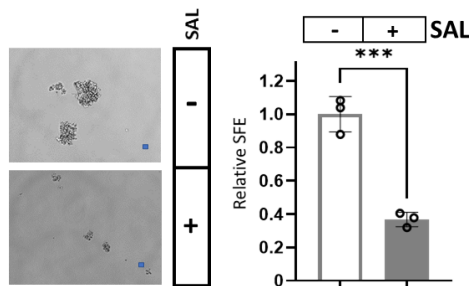

### C. DU-145 CSCs

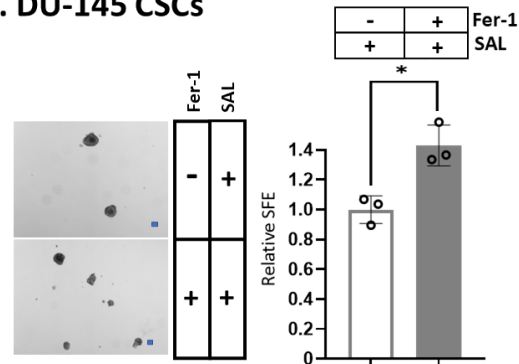

### D. DU-145

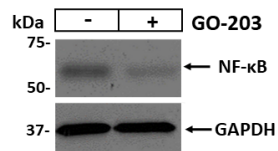

### E. DU-145 CSCs

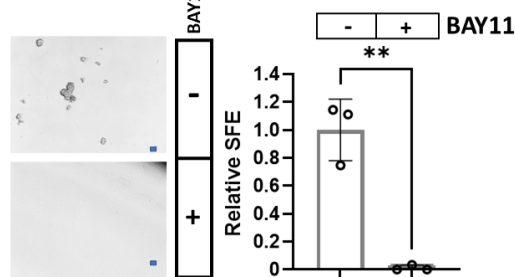

**Supplementary Figure S6. Effects of SAL and targeting MUC1-C in CSCs.** **A.** Enriched S8 CSCs treated with vehicle or 1  $\mu\text{M}$  SAL for 24 hours were analyzed for the indicated mRNA levels by qRT-PCR. The results (mean $\pm$ SD of 4 determinations) are expressed as relative mRNA levels compared to that obtained in vehicle-treated cells (assigned a value of 1) (left). Lysates were immunoblotted with antibodies against the indicated proteins (right). **B.** DU-145 CSCs treated with vehicle or 1  $\mu\text{M}$  SAL for 24 hours were analyzed for tumorsphere formation. Photomicrographs are shown for the treated tumorspheres (left). The results (mean $\pm$ SD of three determinations) are expressed as relative SFE compared to that obtained in control cells (assigned a value of 1) (right). **C.** DU-145 CSCs treated with 1  $\mu\text{M}$  SAL in the absence and presence of 10  $\mu\text{M}$  Fer-1 for 7 days were analyzed for tumorsphere formation. Photomicrographs are shown for the treated tumorspheres (left). The results (mean $\pm$ SD of three determinations) are expressed as relative SFE compared to that obtained in SAL alone treated cells (assigned a value of 1) (right). **D.** Lysates from DU-145 cells left untreated or treated with 2  $\mu\text{M}$  GO-203 for 24 hours were immunoblotted with antibodies against the indicated proteins. **E.** DU-145 CSCs treated

with 10  $\mu\text{M}$  BAY11-7082 for 7 days were analyzed for tumorsphere formation. Photomicrographs are shown for the treated tumorspheres (left). The results (mean $\pm$ SD of three determinations) are expressed as relative SFE compared to that obtained in BAY11-7082 treated cells (assigned a value of 1) (right).

## A. DU-145

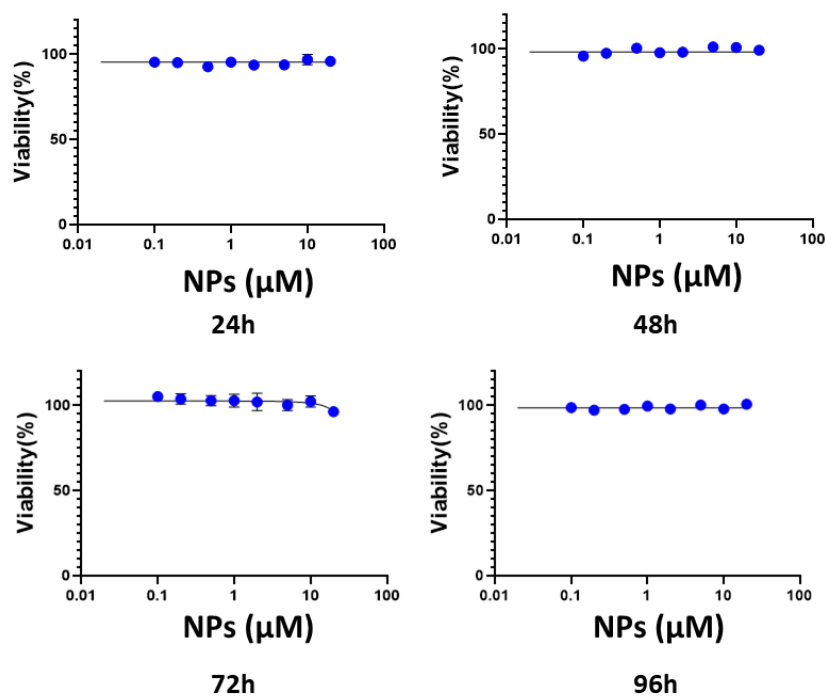

## B. DU-145

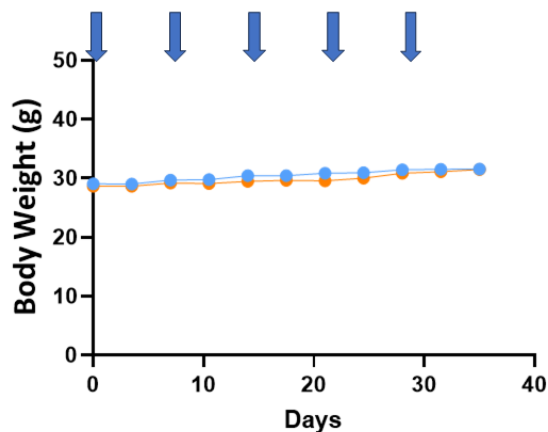

**Supplementary Figure S7. Effects of empty NPs.** **A.** DU-145 cells were treated with empty NPs for 24–96 hours at equivalent amounts used in studies of SAL/NPs shown in Fig. 7A. Viability was assessed by Alamar Blue staining. The results (mean $\pm$ SD of 4 determinations) are expressed as relative viability compared to untreated cells (assigned a value of 100%). **B.** Six-week old nude mice were injected subcutaneously in the flank with  $1 \times 10^7$  DU-145 cells. Mice pair-matched into two groups of 6 mice each when tumors reached 150–200  $\text{mm}^3$  were treated with SAL/NPs or empty NPs each week  $\times$  5 weeks. Body weights are expressed as the mean $\pm$ SEM for six mice.

**Supplementary Table S1. Primers used for qRT-PCR.**

|                                 |         |                        |
|---------------------------------|---------|------------------------|
| <b>MUC1-C</b>                   | Forward | AGACGTCAGCGTGAGTGATG   |
|                                 | Reverse | GCCAAGGCAATGAGATAGA    |
| <b>GSR</b>                      | Forward | GGCTTTCCAAGTTGTGAGGG   |
|                                 | Reverse | TATTCCTAAGCTGGCACCGG   |
| <b>LRP8</b>                     | Forward | CCTGCGAGGGTTCATGTATT   |
|                                 | Reverse | GGCTCAGGAAGTCAGTGGAG   |
| <b>GPX4</b>                     | Forward | AGAGATCAAAGAGTTCGCCG   |
|                                 | Reverse | TTGTCGATGAGGAACTGTGG   |
| <b>CD133</b>                    | Forward | AGTCGGAAACTGGCAGATAGC  |
|                                 | Reverse | GGTAGTGTTGTACTGGGCCAAT |
| <b><math>\beta</math>-actin</b> | Forward | ACAGAGCCTCGCCTTTG      |
|                                 | Reverse | CCTTGCACATGCCGGAG      |
| <b>GAPDH</b>                    | Forward | CCATGGAGAAGGCTGGGG     |
|                                 | Reverse | CAAAGTTGTCATGGATGACC   |

**Supplementary Table S2. Primers used for qPCR.**

|                 |         |                        |
|-----------------|---------|------------------------|
| <b>GSR PLS</b>  | Forward | GCAAGGCTCAGTGGTATCTAC  |
|                 | Reverse | CACTGTAGCCTCAAACCTCCTG |
| <b>LRP8 PLS</b> | Forward | GCTGCGTGGAACCTTGAAAC   |
|                 | Reverse | AAAGGTCTAGCTTCCCGAAAC  |
